# Supplementary material for: Co-Stimulation of Purinergic P2X4 and Prostanoid EP3 Receptors Triggers Synergistic Degranulation in Murine Mast Cells
Source: MDPI journal article supplement (doi:10.3390/ijms20205157), 2019-10-17

Supplementary Fig. 1

The entire western blots shown in **Figure 5A**

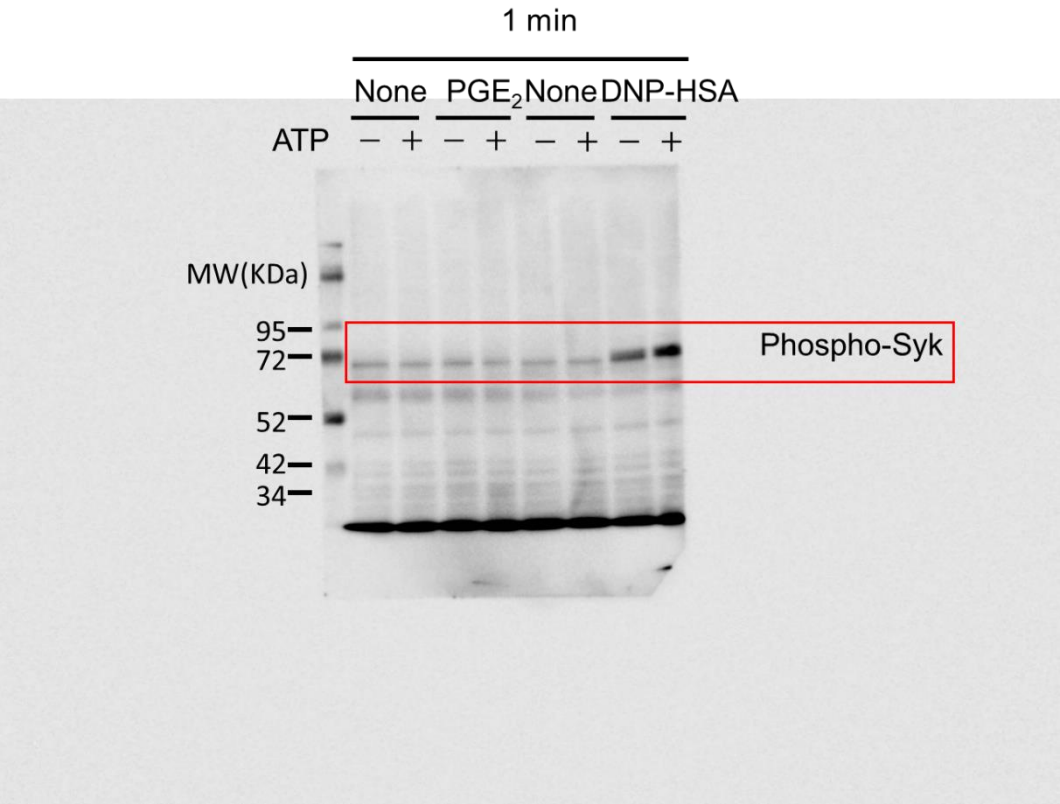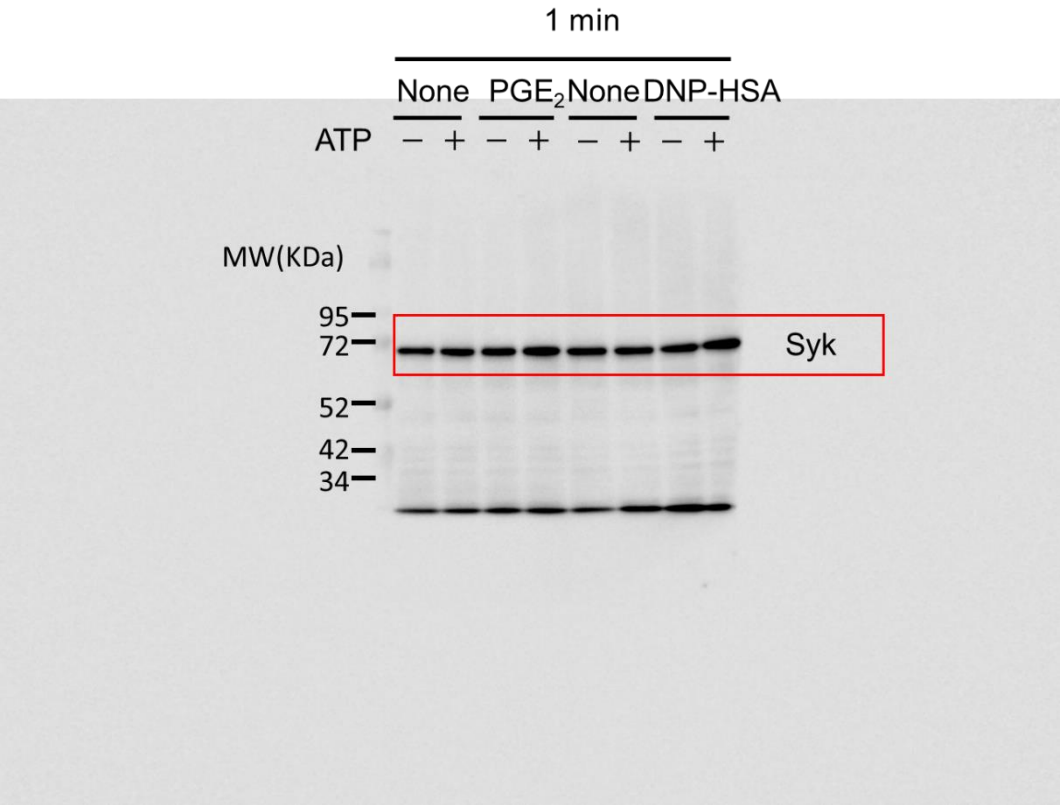

Supplementary Fig. 2

The entire western blots shown in **Figure 5B**

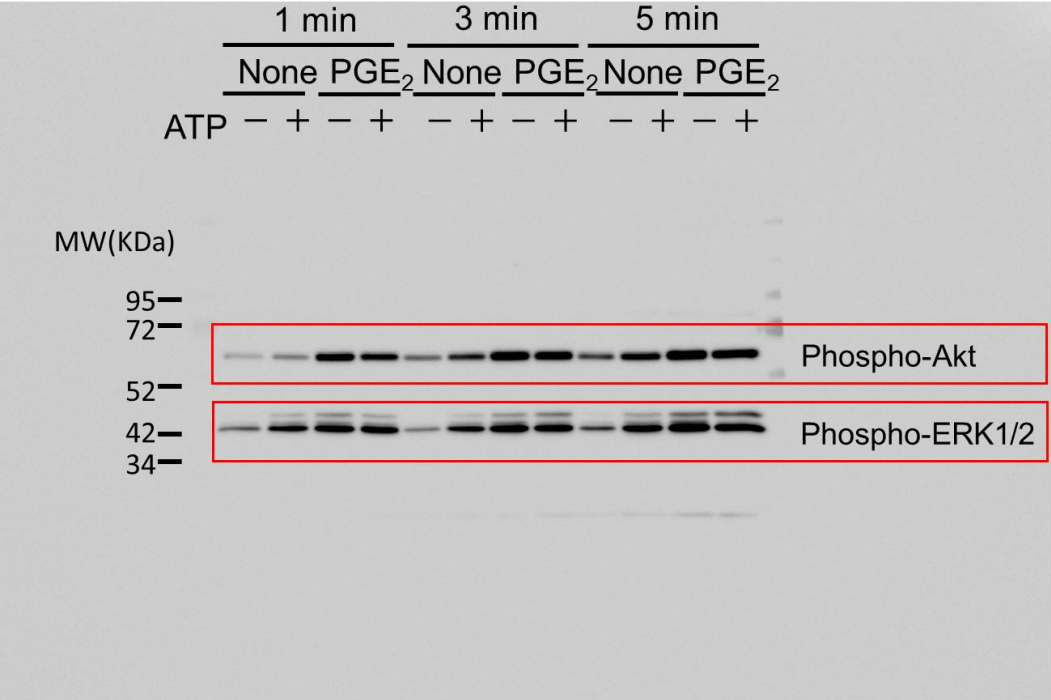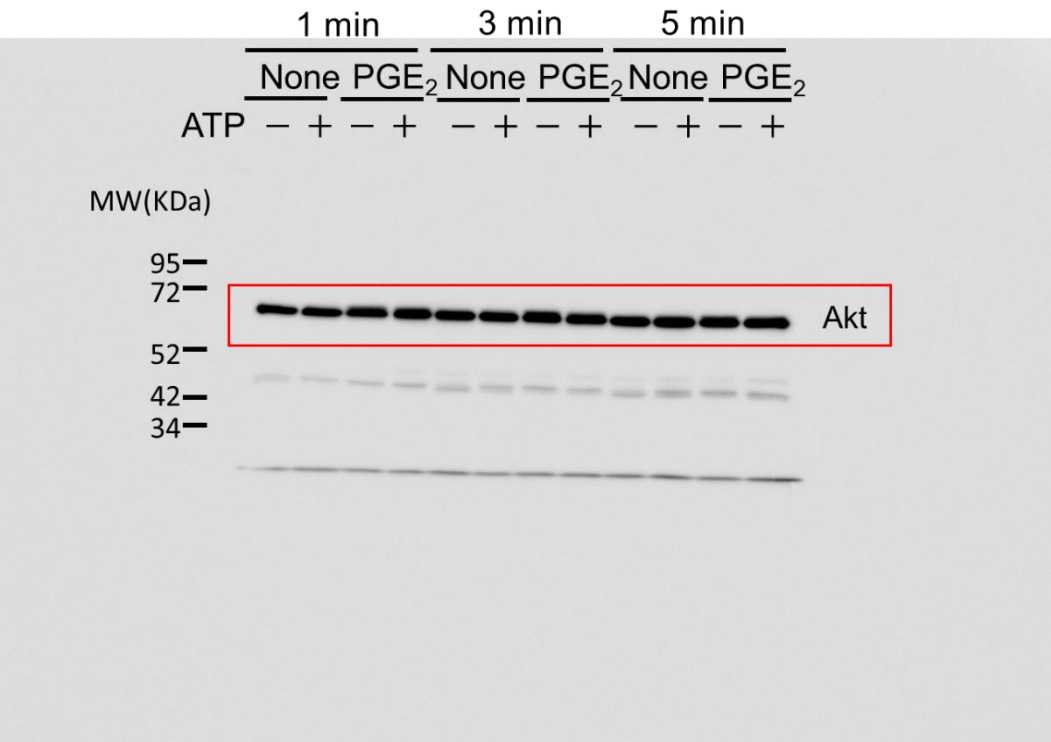

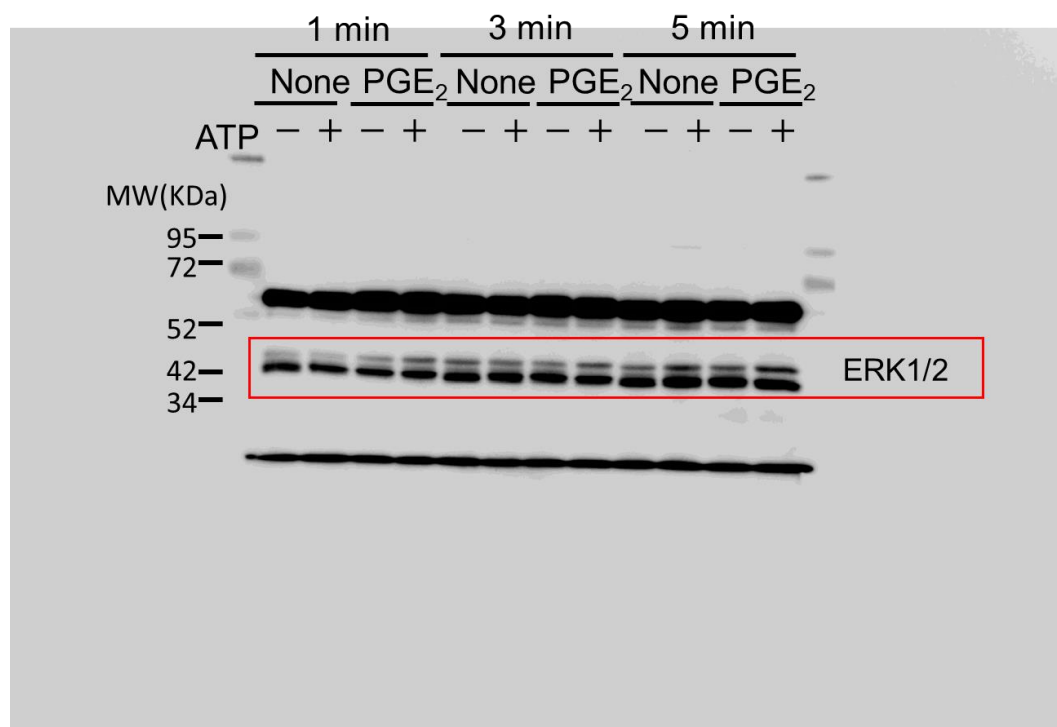

Supplement: s1 [file s1]
